# Supplementary material
Source: Royal Society of Chemistry journal article supplement (doi:10.1039/d6nj01573e)
Supplement: d6nj01573e1.pdf [file d6nj01573e1.pdf]

**Electronic Supplementary Information**

**Decoding Ligand Influence in Porphyrin-Nickel Photocatalysts  
for Degradation of Rhodamine B**

*Nur Jalal Mondal<sup>1, 5</sup>, Tanmi Kundu<sup>1</sup>, Bitupan Mohan<sup>1, 5</sup>, Eman Ali Sk<sup>2</sup>, Mritunjoy Prasad Ghosh<sup>1</sup>, Ijaz Ullah Muzaddadi<sup>3</sup>, Suvankar Deka<sup>4, 5</sup>, Horsita Kalita<sup>4, 5</sup>, Biswajit Choudhury<sup>4, 5</sup>, Devasish Chowdhury<sup>1, 5, \*</sup>*

*<sup>1</sup>Material Nanochemistry Laboratory, Physical Sciences Division, Institute of Advanced Study in Science and Technology, Paschim Boragaon, Garchuk, Guwahati-781035, Assam, India*

*<sup>2</sup>Department of Chemistry, Indian Institute of Technology, Guwahati, Assam, India*

*<sup>3</sup>Department of Chemistry, North Eastern Regional Institute of Science and Technology (NERIST), Itanagar, Papum Pare (District), 791109, Nirjuli, Arunachal Pradesh, India*

*<sup>4</sup>Materials and Energy Laboratory, Physical Sciences Division, Institute of Advanced Study in Science and Technology (IASST), Paschim Boragaon, Vigyan Path, Assam-781035, India*

*<sup>5</sup>Academy of Scientific and Innovative Research (AcSIR), Ghaziabad, 201002, Uttar Pradesh, India.*

*\*Corresponding author Email: [devasish@iasst.gov.in](mailto:devasish@iasst.gov.in)*

### **Characterization techniques**

Surface morphology of the porphyrin nanocatalysts was investigated using FESEM microscopy (FESEM, JEOL-JSM 5600). For collecting absorption spectra and dye degradation data, ultraviolet–visible (UV–Vis) spectroscopy (UV-2550, Shimadzu, USA) was employed. To elucidate the photocatalytic activity exhibited by the catalyst, their photoluminescence (PL) spectra were obtained using an enhanced-performance benchtop modular photoluminescence spectrophotometer (Model: QM08075–21-C, Make: Horiba instruments). The proton ( $^1\text{H}$ ), carbon ( $^{13}\text{C}$ ) and fluorine  $^{19}\text{F}$  NMR spectra were recorded on a Bruker spectrometer operating at 600 MHz, (151 MHz, 125 MHz) and 565 MHz, respectively, at IIT, Guwahati. TMS is used as an internal reference; chemical shifts ( $\delta$  scale) are reported in parts per million (ppm).  $^1\text{H}$  NMR spectra are reported in the order of multiplicity, coupling constant (J value) in Hertz (Hz), and the number of protons; signals were characterised as s (singlet), and d (doublet). All NMR experiments were conducted at 298.15 K. All the samples were prepared in  $\text{CDCl}_3$ , stirred thoroughly, sonicated, and allowed to equilibrate overnight at room temperature before measurement. NMR data were processed using MestReNova (14.3.3). HRMS spectra were recorded on an ESI mass analyzer. Elemental analysis was done using CHNSO Analyser (Model: FLASH Smart, Thermo). The crystal structure was determined using a single-crystal XRD diffractometer. Complete crystallographic data of compounds (CCDC no. 2482202) for the structural analysis have been deposited with the Cambridge Crystallographic Data Centre. Copies of this information may be obtained free of charge from the Director, Cambridge Crystallographic Data Centre, 12 Union Road, Cambridge CB2 1EZ, UK (fax: + 44-1223-336033, e-mail: [deposit@ccdc.cam.ac.uk](mailto:deposit@ccdc.cam.ac.uk) or via: [www.ccdc.cam.ac.uk](http://www.ccdc.cam.ac.uk)).

**X-ray crystallographic data of compound 5,10,15,20-Tetraphenyl Ni (II) porphyrin (Ni-L<sub>1</sub>)**

| Entry | Identification Code           | Ni-L <sub>1</sub>                                                                                 |
|-------|-------------------------------|---------------------------------------------------------------------------------------------------|
| 01    | Empirical formula             | C <sub>44</sub> H <sub>28</sub> N <sub>4</sub> Ni, C <sub>44</sub> H <sub>30</sub> N <sub>4</sub> |
| 02    | Formula weight                | 1286.11                                                                                           |
| 03    | Temperature                   | 298 K                                                                                             |
| 04    | Wavelength                    | 0.71073                                                                                           |
| 05    | Radiation type                | Mo K $\alpha$                                                                                     |
| 06    | Radiation system              | Fine-focus sealed tube                                                                            |
| 07    | Crystal system                | Tetragonal I                                                                                      |
| 08    | Space group                   | I 21 21 21                                                                                        |
| 09    | Cell length (Å)               | <u>(a)=15.0803(11), (b)=13.8787(10),</u><br><u>(c)=15.0818(11)</u>                                |
| 10    | Cell angle (°)                | ( $\alpha$ )=90, ( $\beta$ )=90, ( $\gamma$ )=90                                                  |
| 11    | Cell volume (Å <sup>3</sup> ) | 3156.5(4)                                                                                         |
| 12    | Density                       | 1.353                                                                                             |
| 13    | Absorption correction         | Multi-scan                                                                                        |
| 14    | Reflection number             | 4888 [2704]                                                                                       |
| 15    | Cell formula units Z          | 2                                                                                                 |
| 16    | CCDC no                       | 2482202                                                                                           |

**Table T1:** Crystal data and structure refinement for compound ATK-ES-5-P

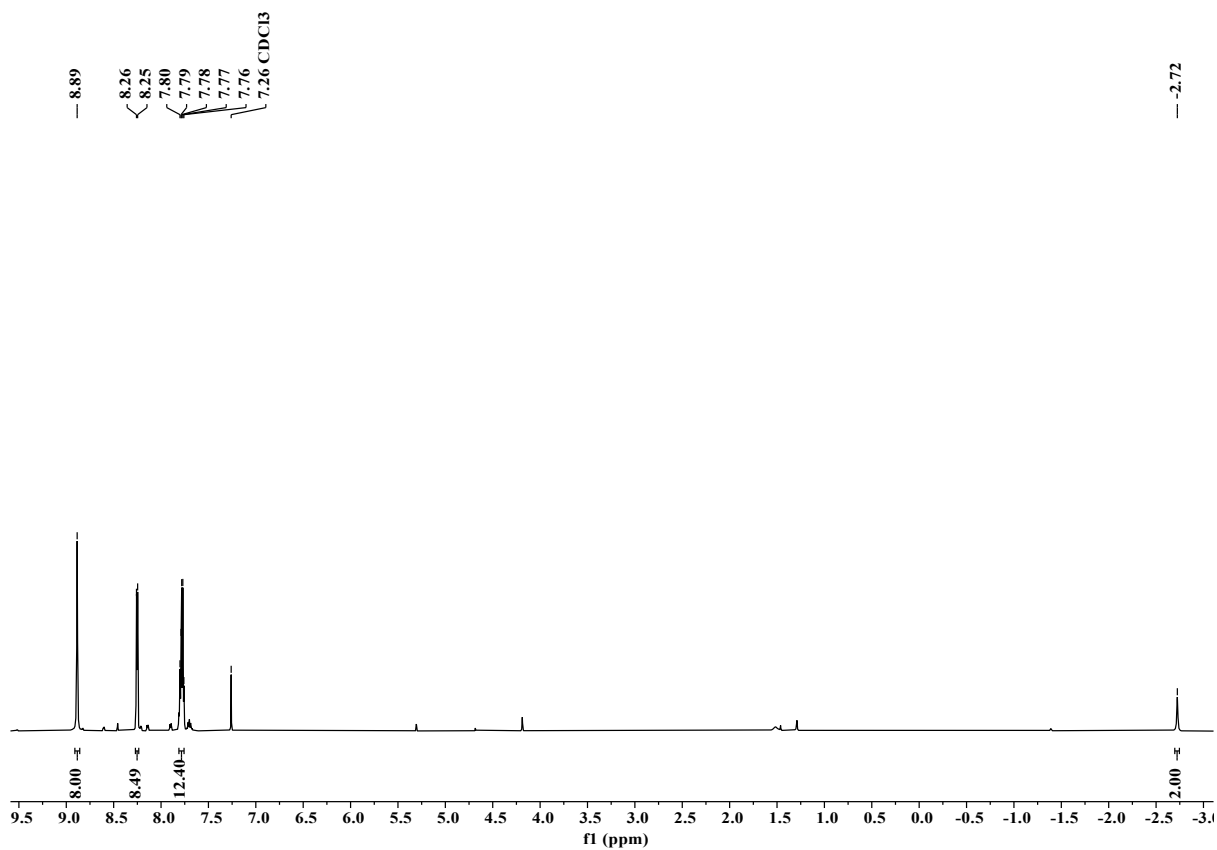

**Figure S1.1. A.**  $^1\text{H}$  spectrum of  $\text{L}_1$  recorded in  $\text{CDCl}_3$  at room temperature

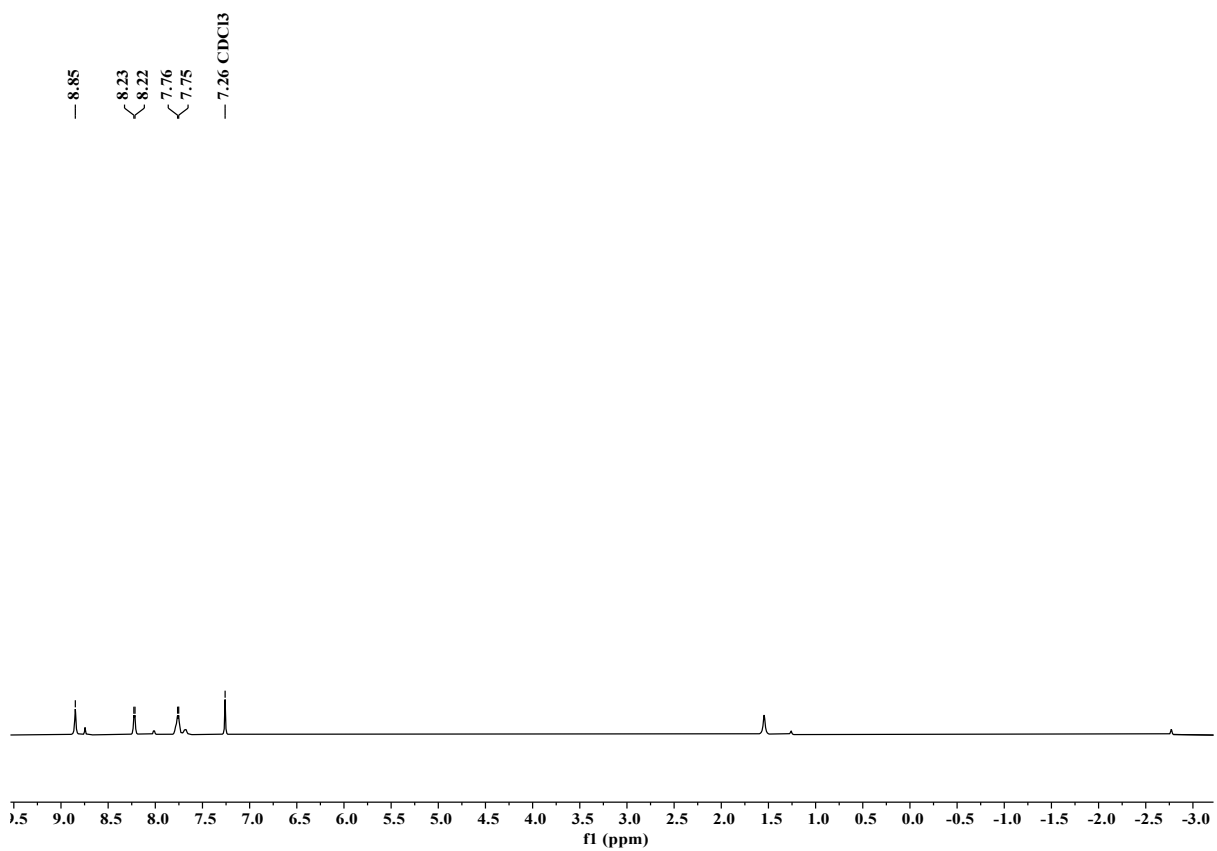

**Figure S1.1. B.**  $^1\text{H}$  spectrum of  $\text{Ni-L}_1$  recorded in  $\text{CDCl}_3$  at room temperature

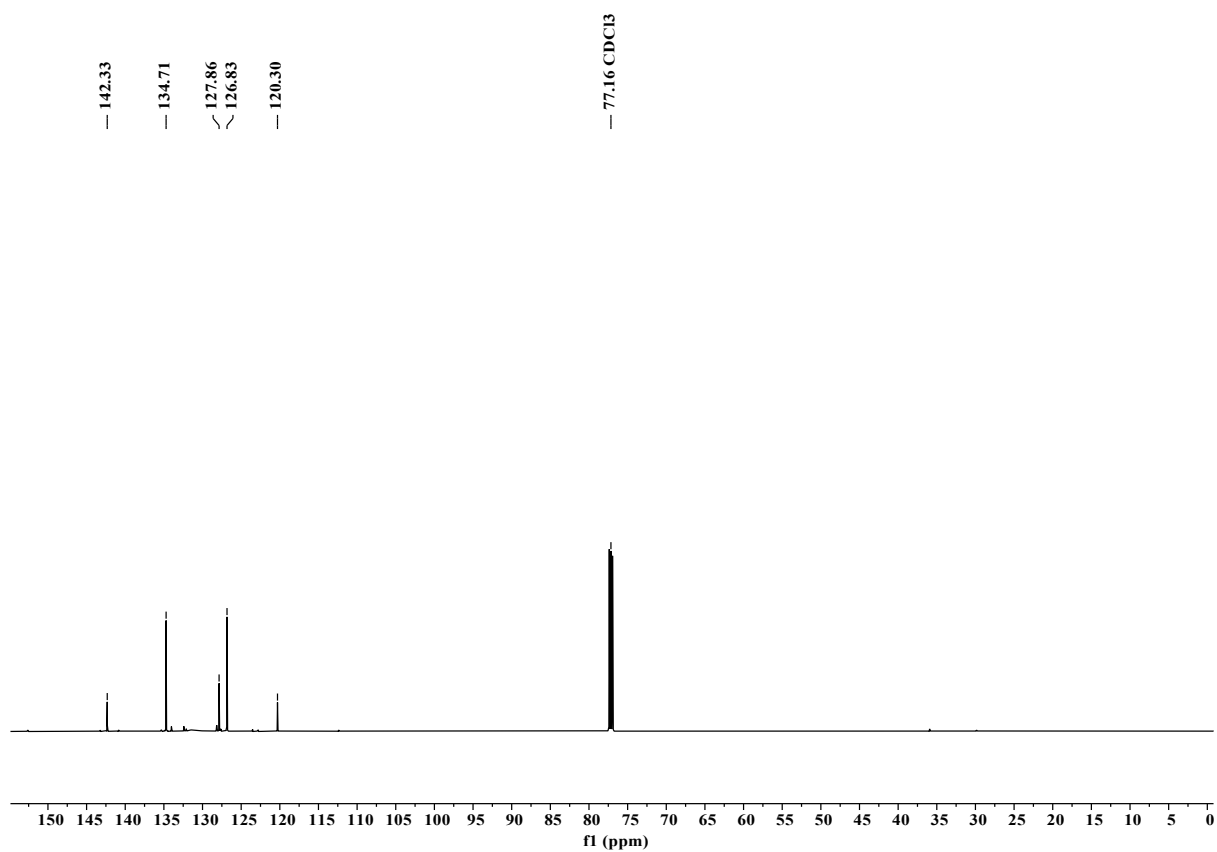

**Figure S1.1. C.** <sup>13</sup>C spectrum of L<sub>1</sub> recorded in CDCl<sub>3</sub> at room temperature

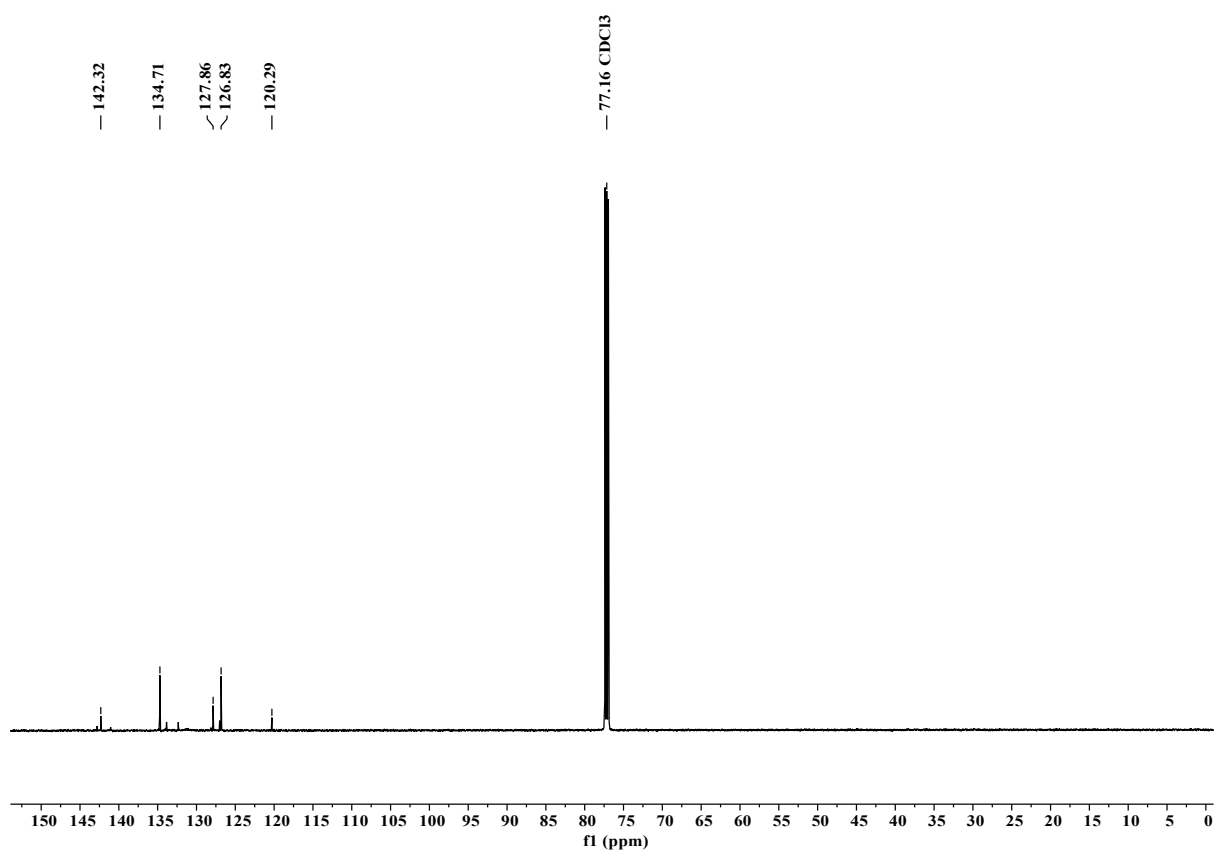

**Figure S1.1. D.** <sup>13</sup>C spectrum of Ni-L<sub>1</sub> recorded in CDCl<sub>3</sub> at room temperature

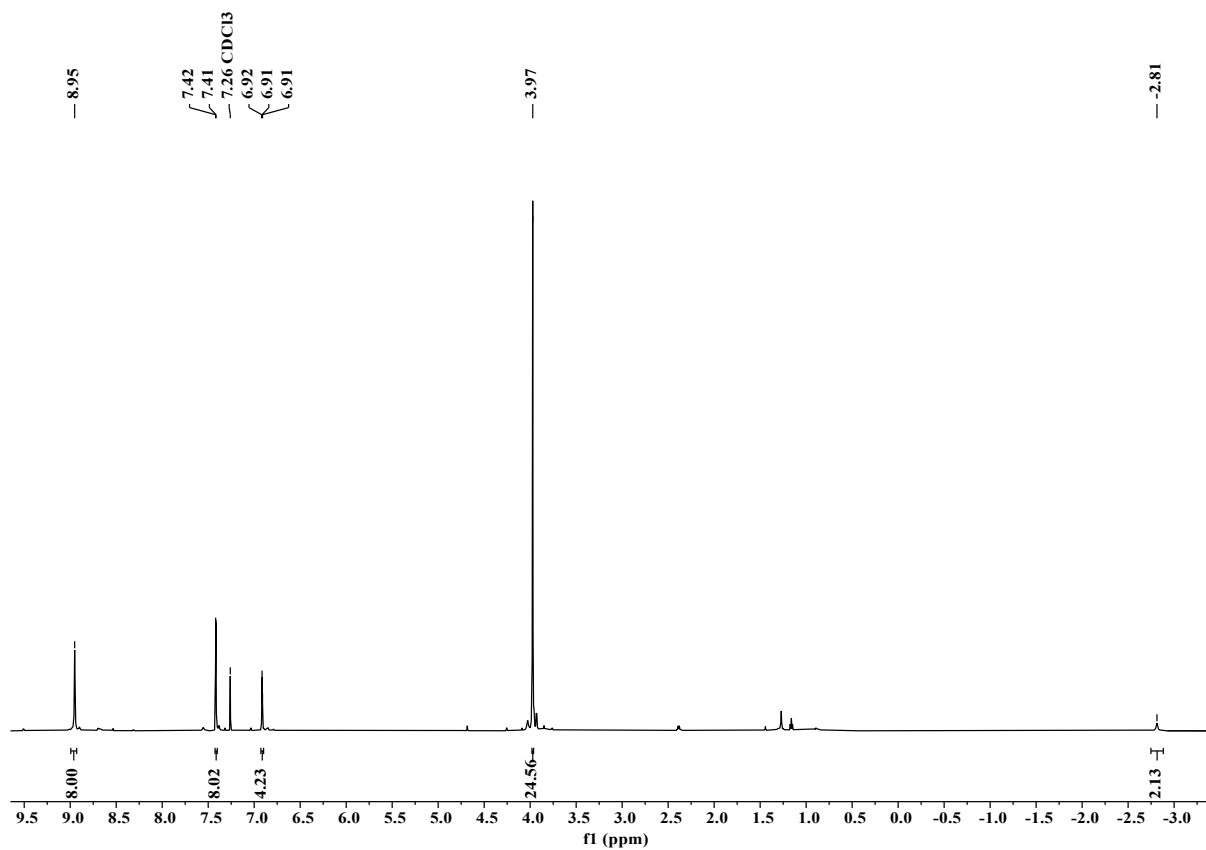

**Figure S1.2. A.** <sup>1</sup>H spectrum of L<sub>2</sub> recorded in CDCl<sub>3</sub> at room temperature

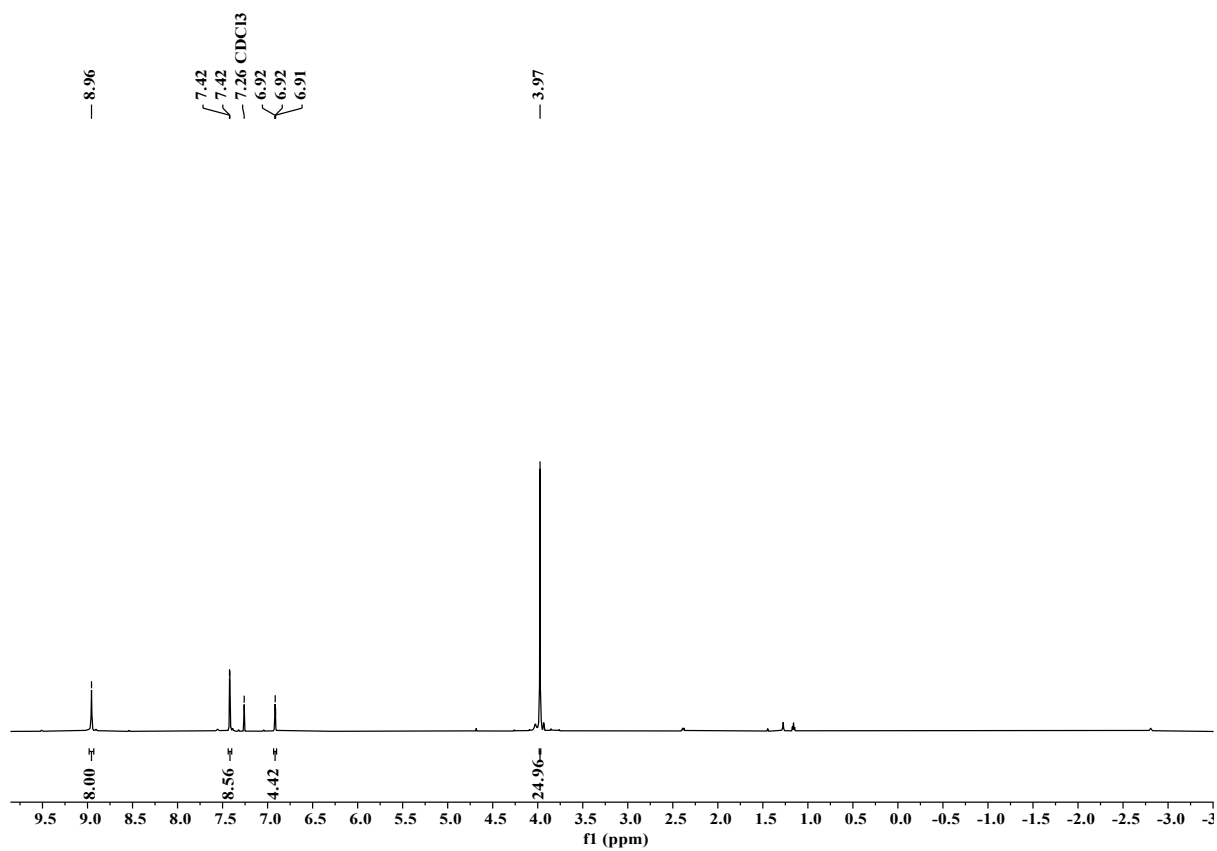

**Figure S1.2. B.** <sup>1</sup>H spectrum of Ni-L<sub>2</sub> recorded in CDCl<sub>3</sub> at room temperature

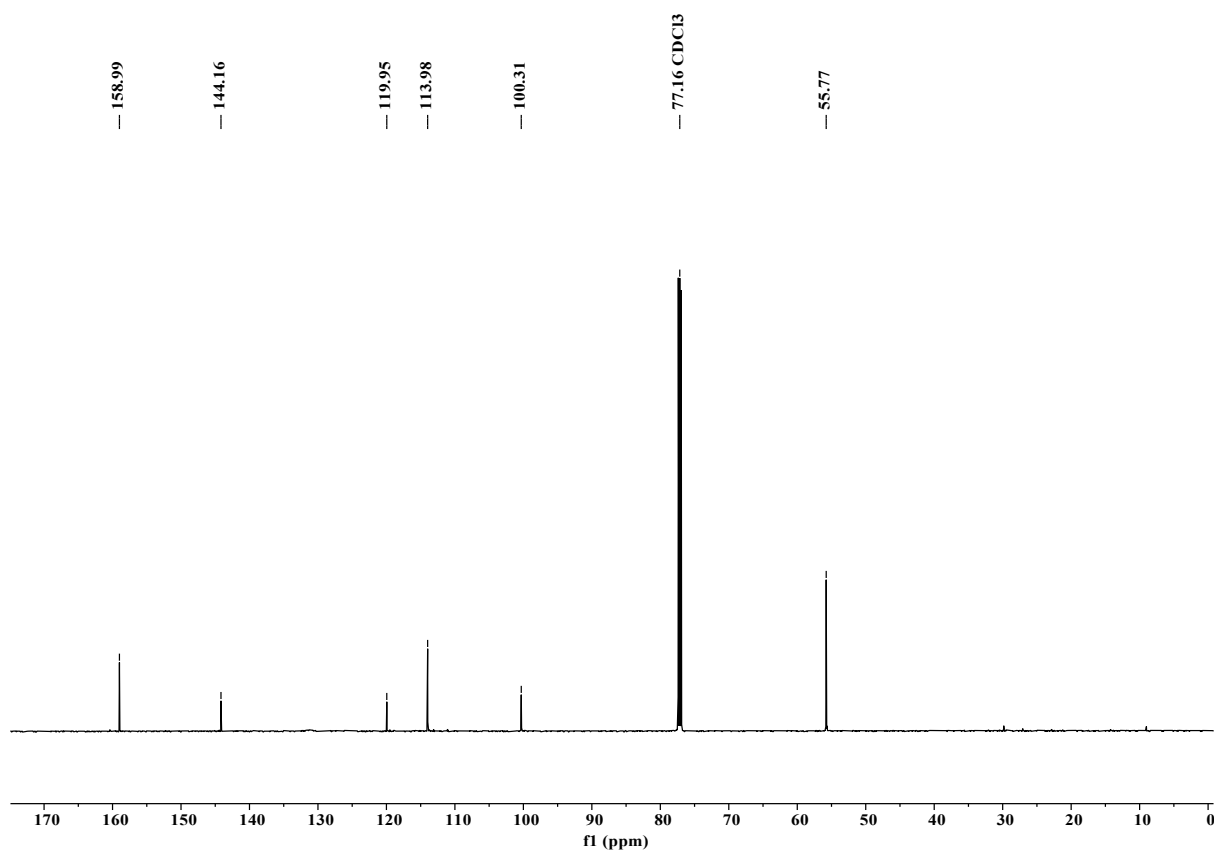

Figure S1.2. C. <sup>13</sup>C spectrum of L<sub>2</sub> recorded in CDCl<sub>3</sub> at room temperature

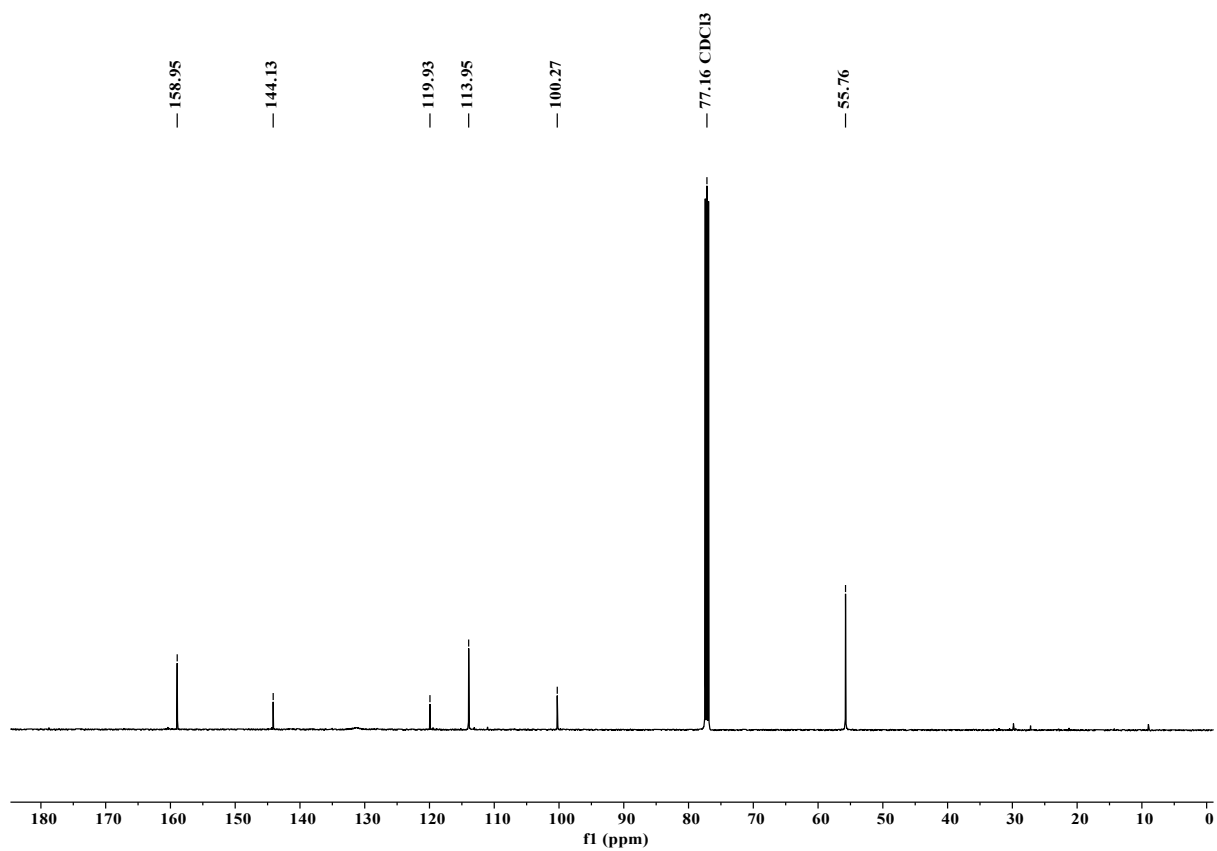

Figure S1.2. D. <sup>13</sup>C spectrum of Ni-L<sub>2</sub> recorded in CDCl<sub>3</sub> at room temperature

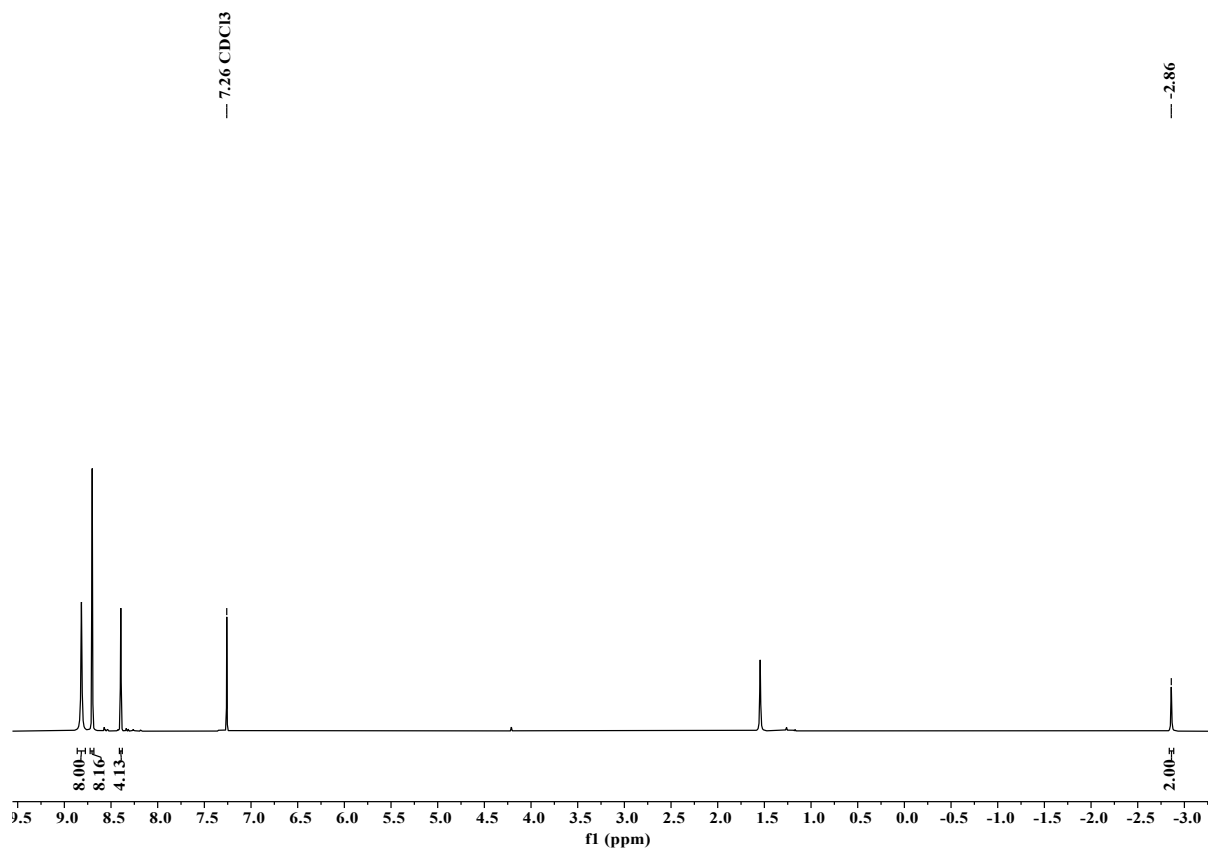

Figure S1.3. A. <sup>1</sup>H spectrum of L<sub>3</sub> recorded in CDCl<sub>3</sub> at room temperature

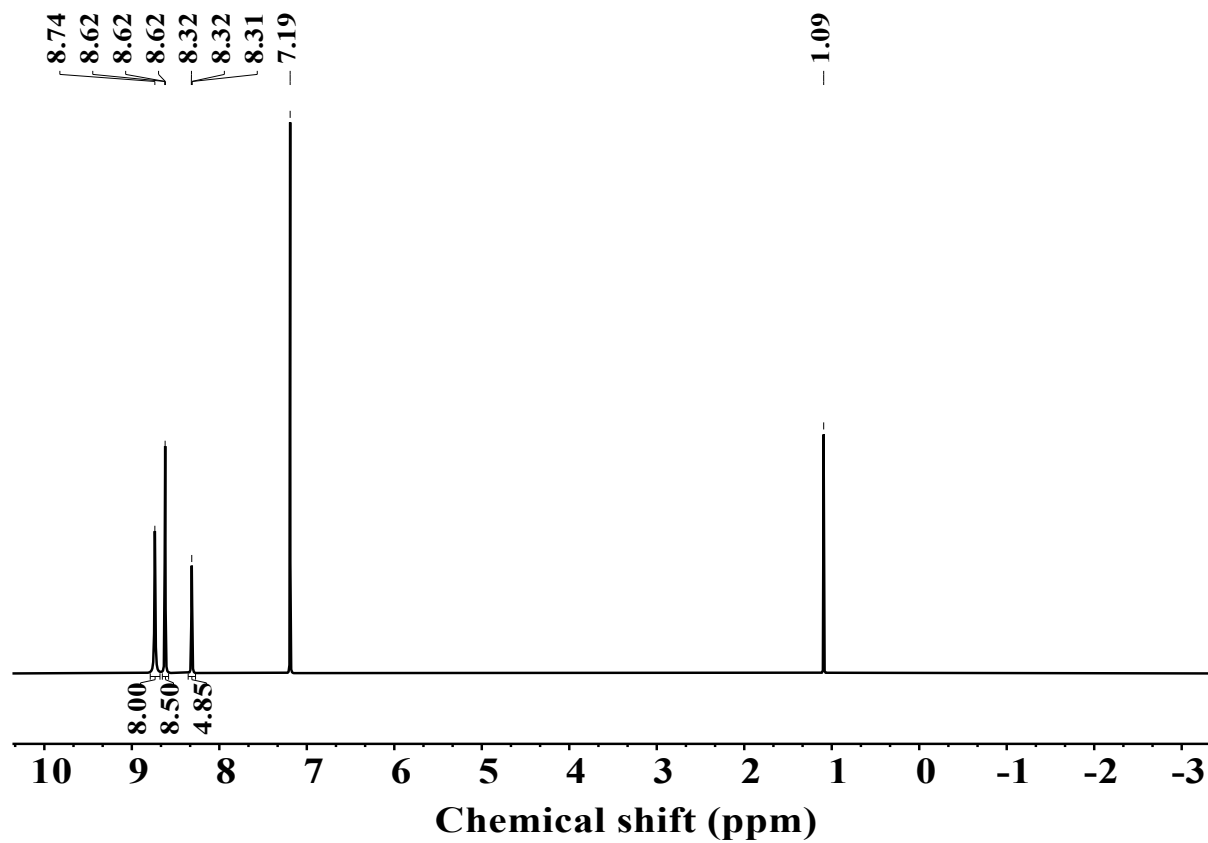

Figure S1.3. B. <sup>1</sup>H spectrum of Ni-L<sub>3</sub> recorded in CDCl<sub>3</sub> at room temperature

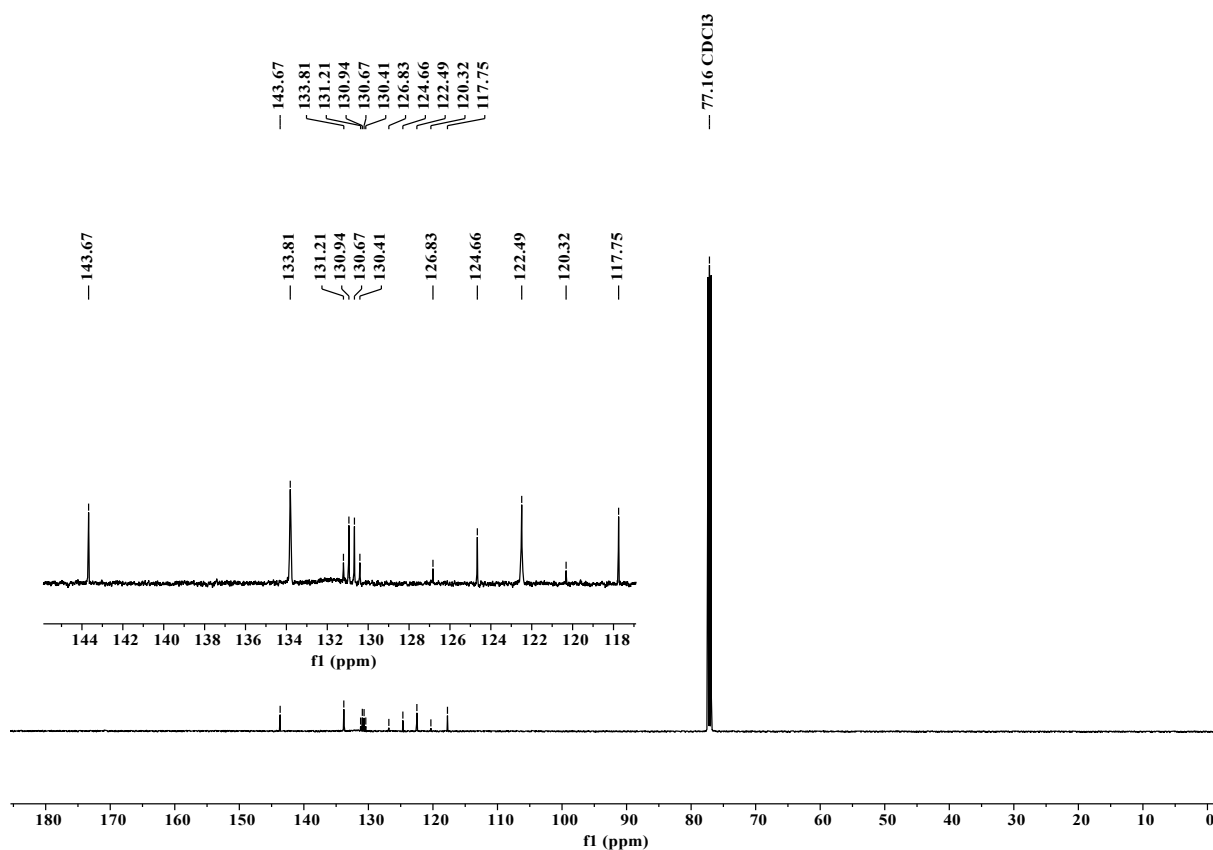

Figure S1.3. C. <sup>13</sup>C spectrum of L<sub>3</sub> recorded in CDCl<sub>3</sub> at room temperature

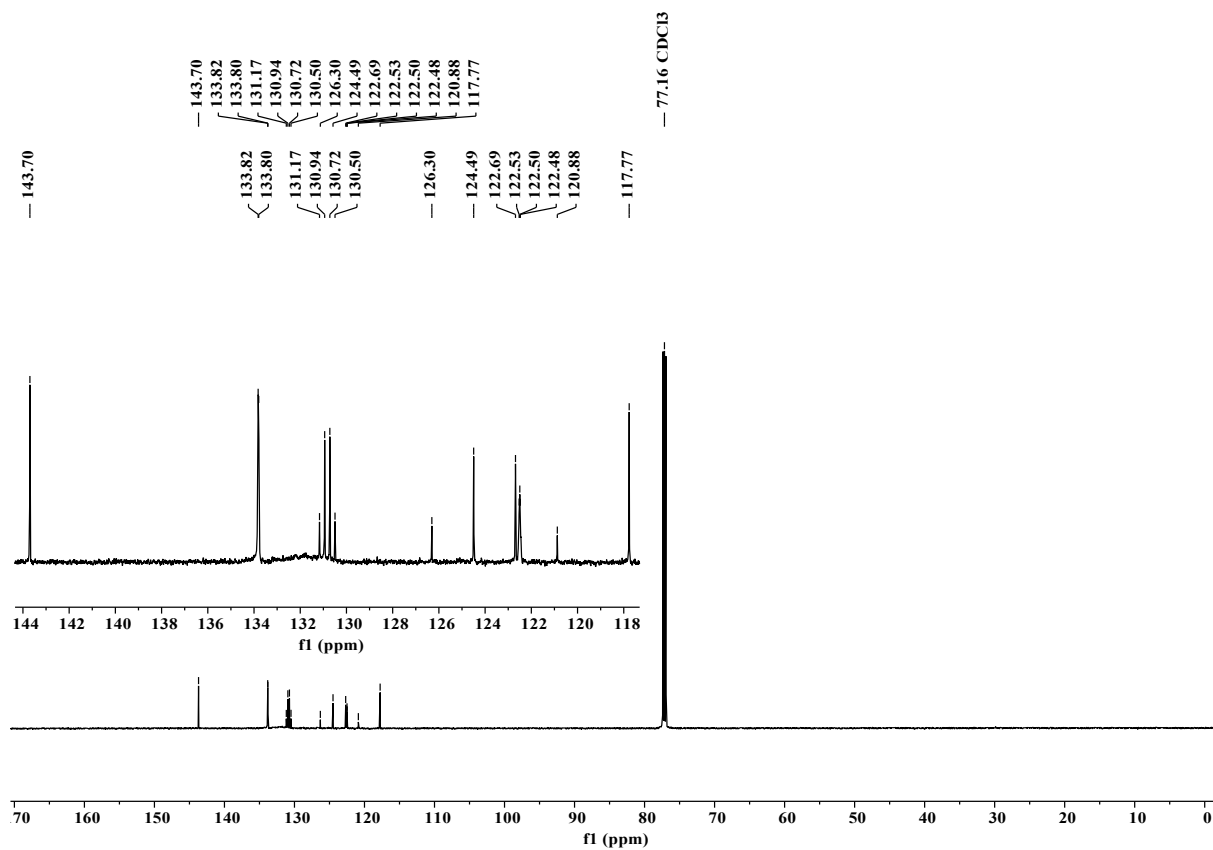

Figure S1.3. D. <sup>13</sup>C spectrum of Ni-L<sub>3</sub> recorded in CDCl<sub>3</sub> at room temperature

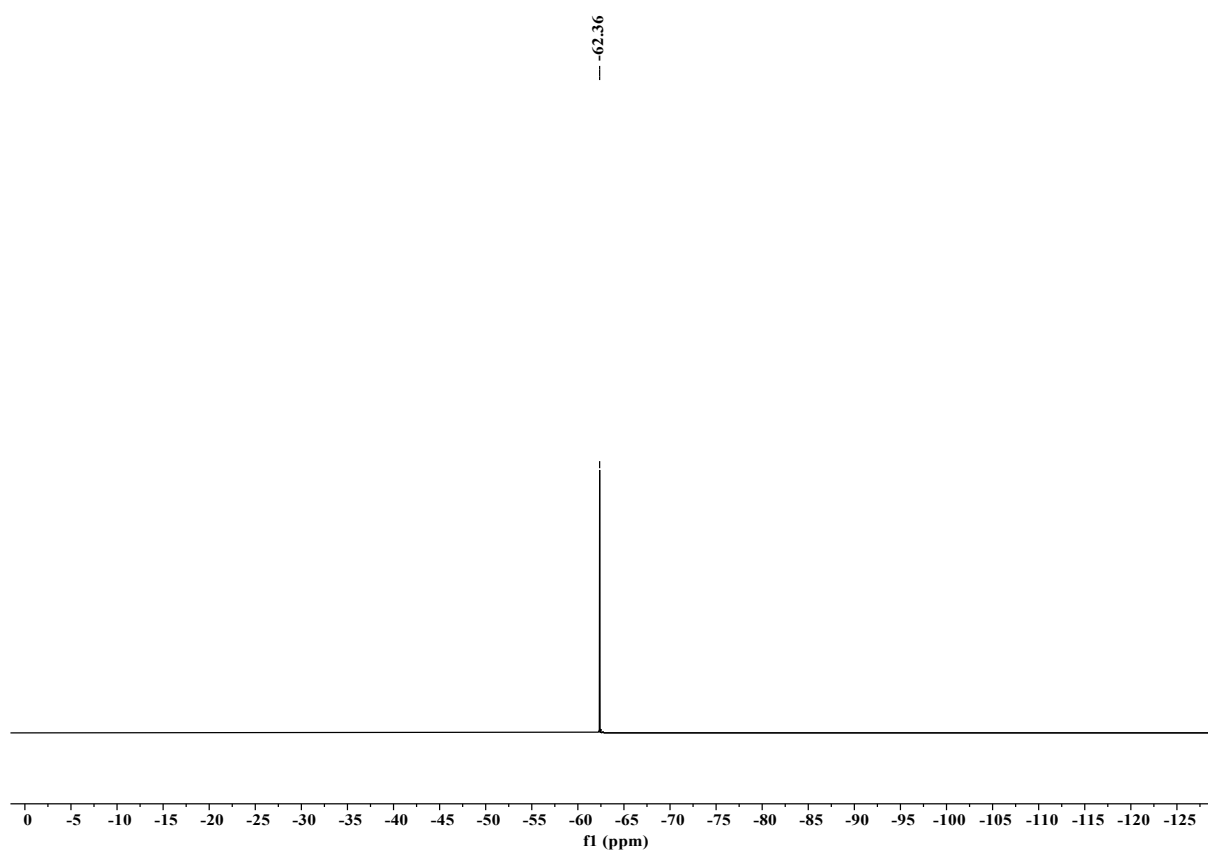

**Figure S1.3. E.**  $^{19}\text{F}$  spectrum of  $\text{L}_3$  recorded in  $\text{CDCl}_3$  at room temperature

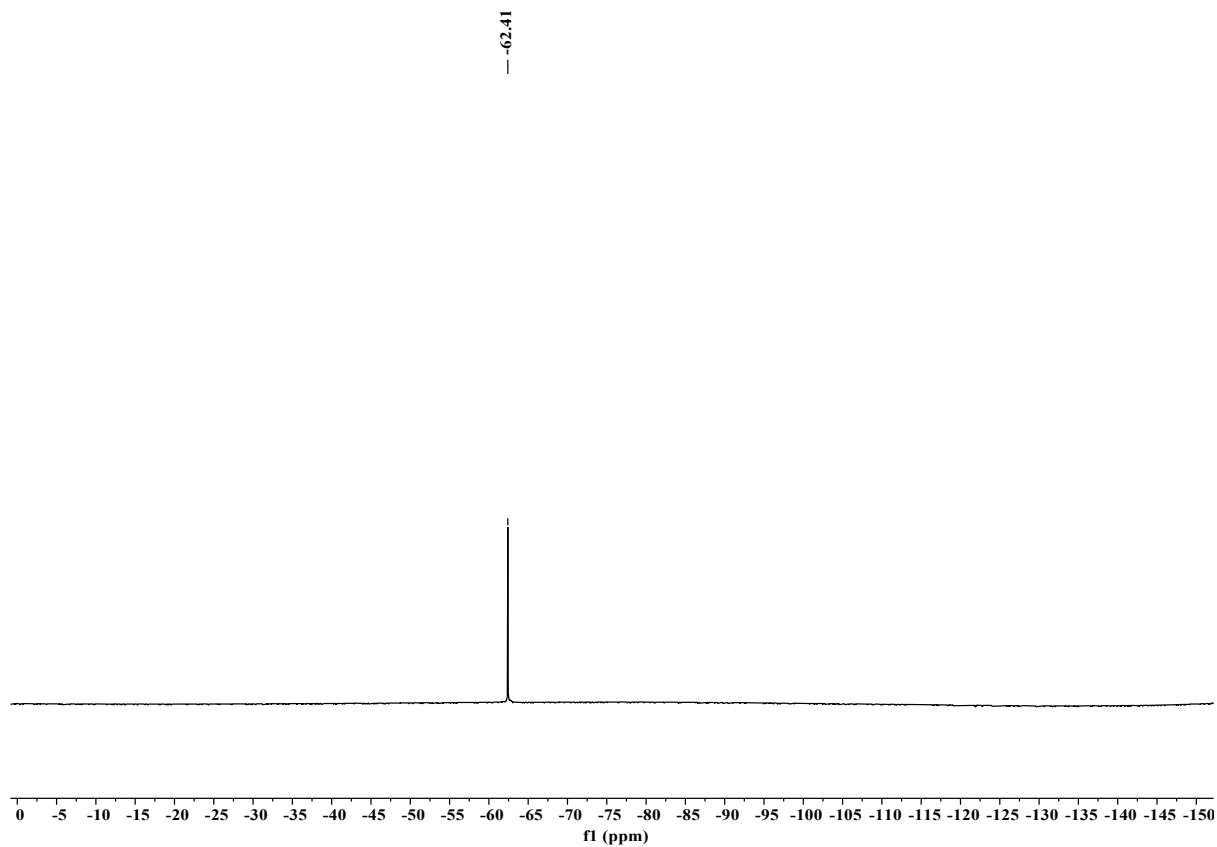

**Figure S1.3. F.**  $^{19}\text{F}$  spectrum of  $\text{Ni-L}_3$  recorded in  $\text{CDCl}_3$  at room temperature

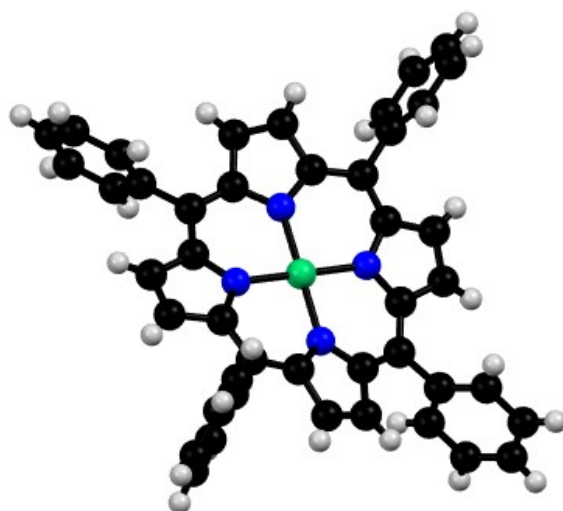

**Figure S2:** ORTEP Diagram (50 % probability) of compound 5,10,15,20-Tetraphenyl Ni (II) porphyrin (Ni-L<sub>1</sub>)

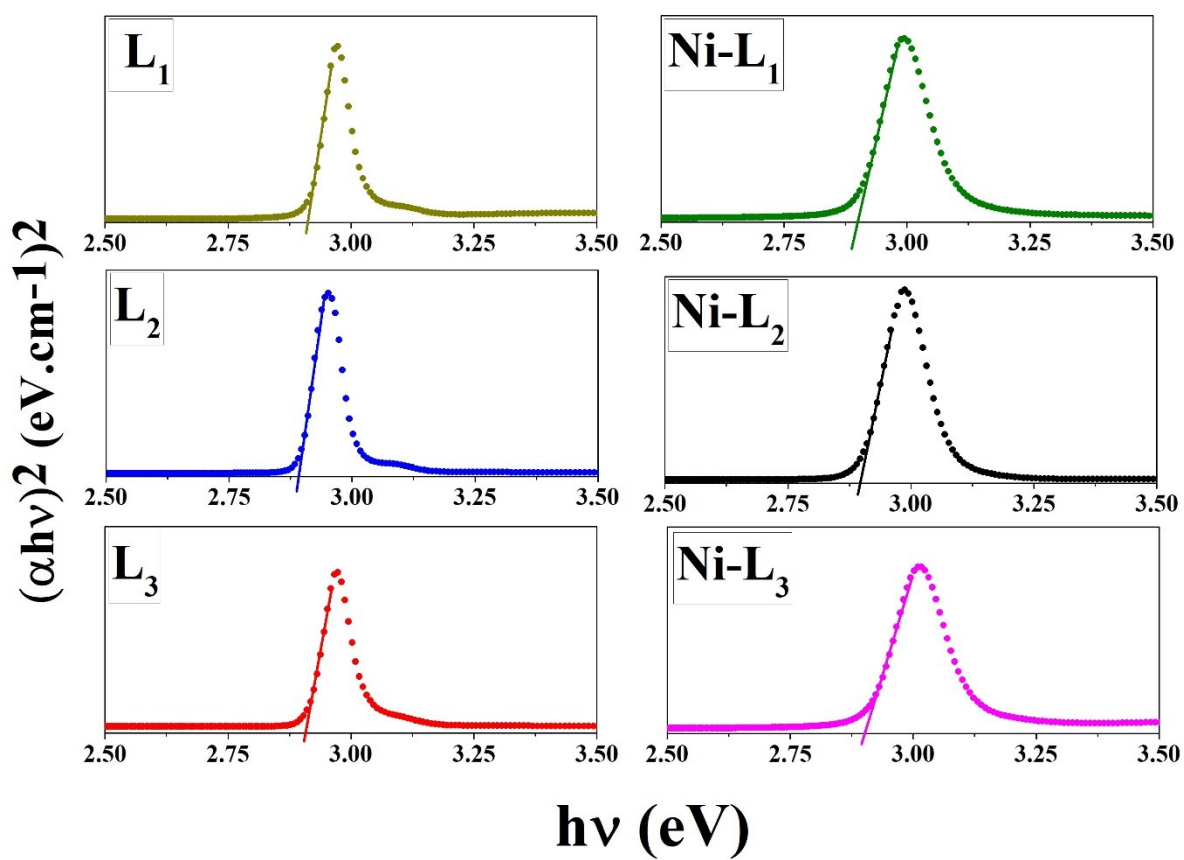

**Figure S3:** Tauc plot obtained at 300 K for the entire sample.

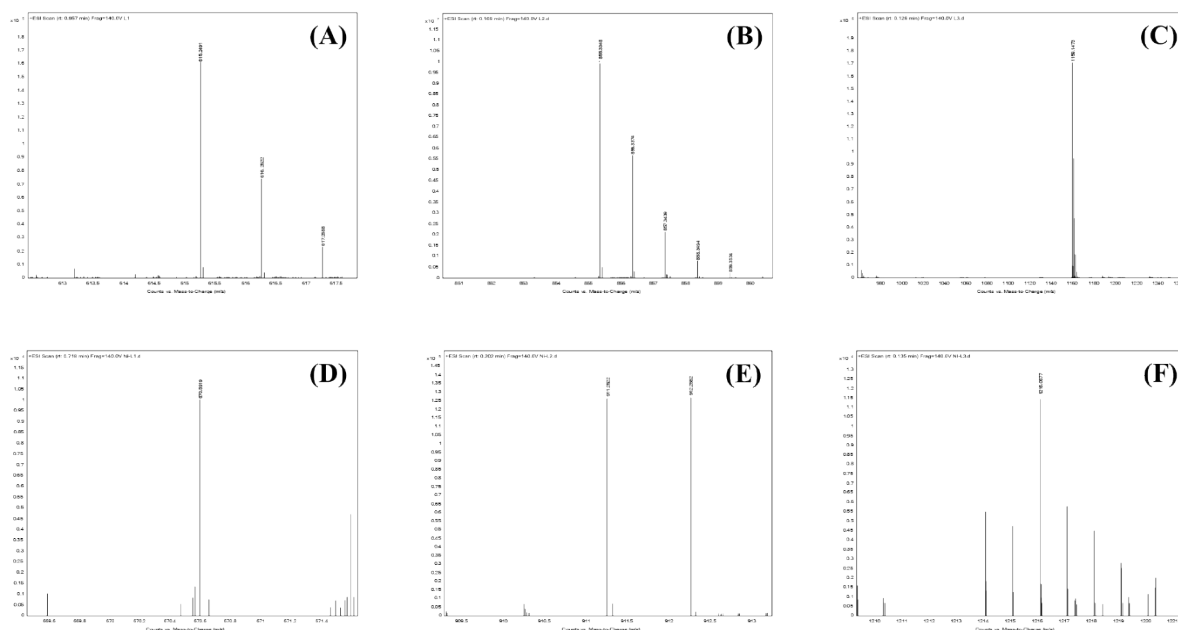

**Figure S4:** High-resolution mass spectrum (HRMS) in (A) L<sub>1</sub>, (B) L<sub>2</sub>, and (C) L<sub>3</sub> and (D) Ni-L<sub>1</sub>, (E) Ni-L<sub>2</sub> and (F) Ni-L<sub>3</sub>, respectively

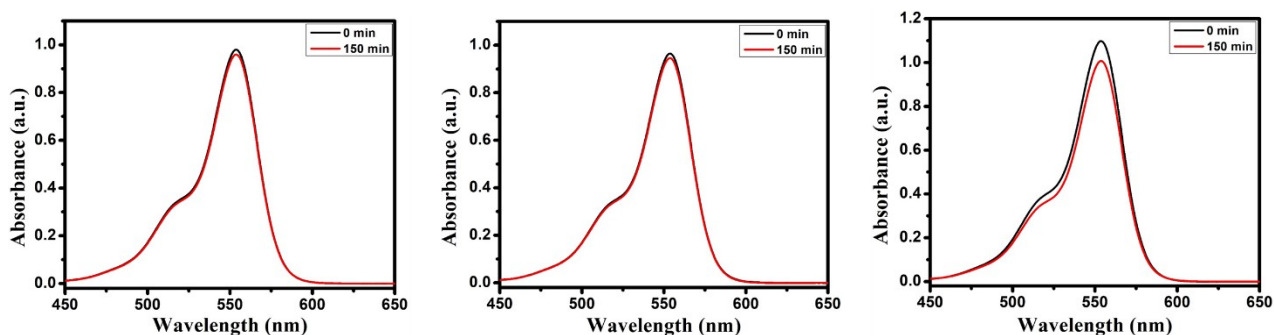

**Figure S5:** Control experiments: RhB dye degradation in the dark, using only light, and using only the catalyst, respectively (from left to right)

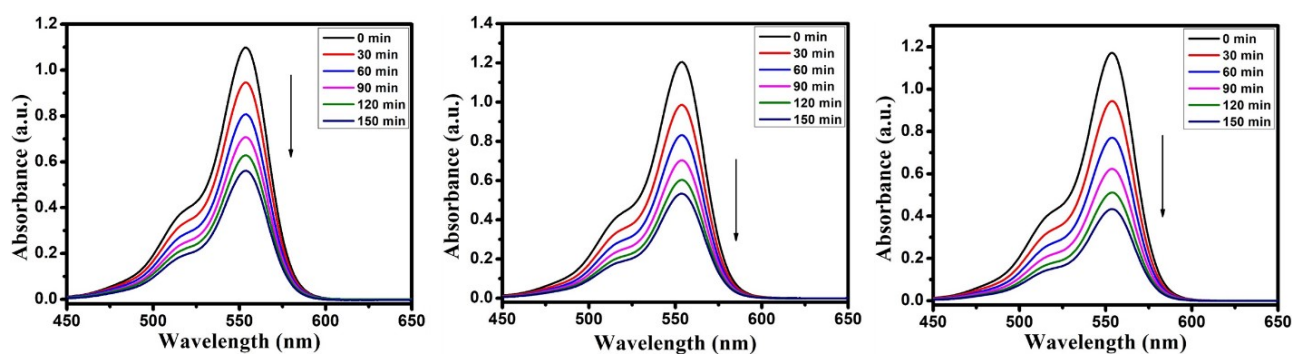

**Figure S6:** Time-dependent absorption spectra of RhB by L<sub>1</sub>, L<sub>2</sub>, and L<sub>3</sub>

| Parameters | L <sub>1</sub> | L <sub>2</sub> | Ni-L <sub>2</sub> | Ni-L <sub>3</sub> |
|------------|----------------|----------------|-------------------|-------------------|
|------------|----------------|----------------|-------------------|-------------------|

|                 |          |          |          |          |
|-----------------|----------|----------|----------|----------|
| R1              | 3.912    | 4.612    | 4.082    | 3.772    |
| R2              | 6.271    | 2.23E+01 | 11.72    | 8.61     |
| R3              | 47.26    | 23.28    | 80.41    | 43.78    |
| Yo4             | 5.28E-06 | 5.11E-03 | 6.32E-06 | 4.47E-04 |
| a5              | 7.83E-01 | 6.20E-01 | 7.63E-01 | 5.74E-01 |
| Yo6             | 4.24E-02 | 3.87E-06 | 9.94E-03 | 1.19E-03 |
| a7              | 3.27E-01 | 7.57E-01 | 6.05E-01 | 8.34E-01 |
| R8              | 4.46E+04 | 5.73E+03 | 5.20E+03 | 4.38E+03 |
| Yo9             | 6.45E-04 | 2.16E-03 | 3.23E-03 | 9.11E-04 |
| a10             | 9.33E-01 | 9.36E-01 | 9.62E-01 | 7.74E-01 |
| Goodness of Fit | 1.60E-05 | 2.84E-04 | 1.72E-04 | 6.07E-04 |

**Table T2.** Fitted parameters of Nyquist Plot

| Sample              | $E_{CB}$ (V)                | $E_{VB} \approx E_{fb}$ (V) |
|---------------------|-----------------------------|-----------------------------|
| $L_1$ (2.91 eV)     | -2.05                       | 0.86                        |
| $L_2$ (2.90 eV)     | -2.10                       | 0.80                        |
| Ni- $L_2$ (2.90 eV) | -2.06                       | 0.84                        |
| Sample              | $E_{CB} \approx E_{fb}$ (V) | $E_{VB}$ (V)                |
| Ni- $L_3$ (2.91 eV) | +0.02                       | 2.93                        |

**Table T3.** Conduction band and Valence band edge potentials of  $L_1$ ,  $L_2$ , Ni- $L_2$  and Ni- $L_3$  obtained from Mott-Schottky analysis performed in 1 M KCl.

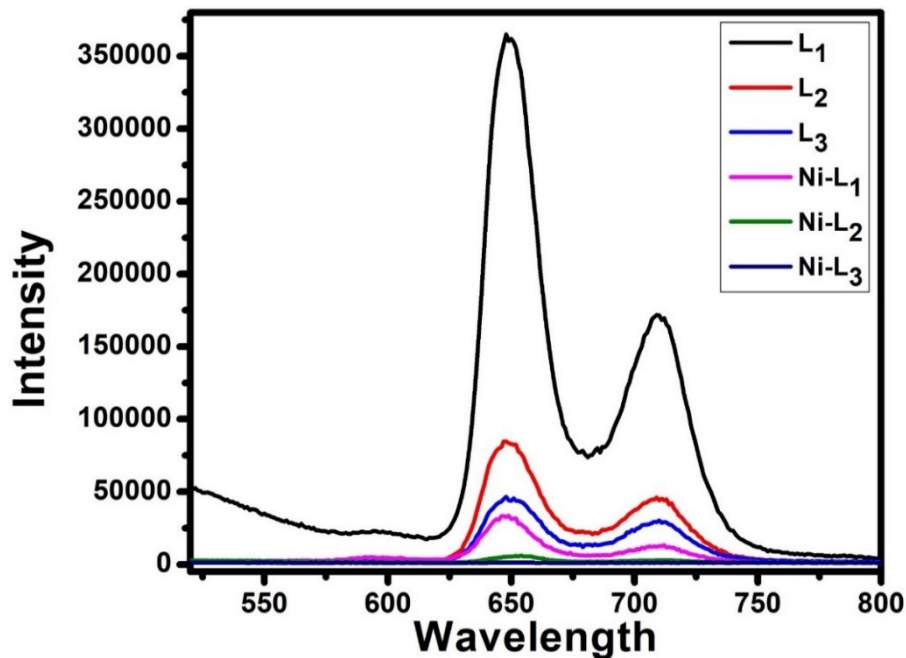

**Figure S7:** Photoluminescence spectra of L<sub>1</sub>, L<sub>2</sub>, L<sub>3</sub>, Ni-L<sub>1</sub>, Ni-L<sub>2</sub>, and Ni-L<sub>3</sub> excited at 420 nm

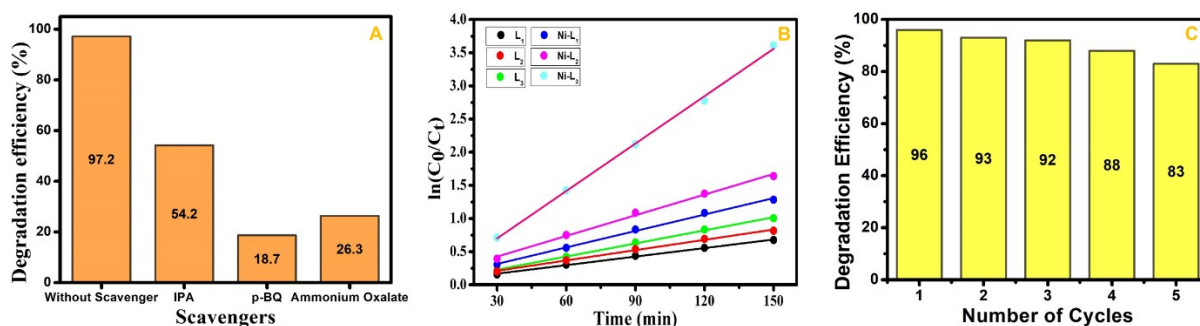

**Figure S8:** (A) Effect of radical intermediate trapping (B) agents First-order degradation rate kinetics and (C) Reusability test on the removal efficiency of RhB upon visible light irradiation

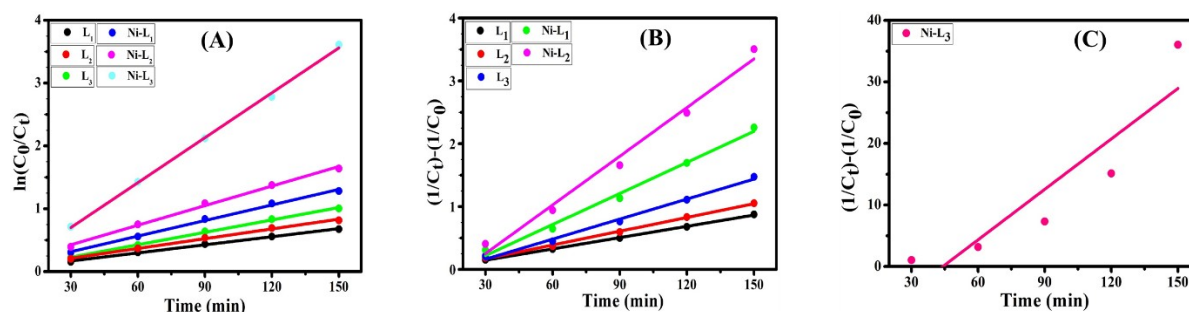

**Figure S9:** (A) First-order degradation rate kinetics and (B, C) Rate constant of 2<sup>nd</sup> order kinetics

**Table T4. DFT calculation data for Ni-L<sub>3</sub>**

Center Atomic Atomic Coordinates (Angstroms)

Number Number Type X Y Z

|   |   |   |           |           |           |
|---|---|---|-----------|-----------|-----------|
| 1 | 6 | 0 | 1.320329  | 2.439741  | 0.345382  |
| 2 | 6 | 0 | 3.229311  | -1.413940 | -0.772278 |
| 3 | 6 | 0 | -0.988062 | -2.377943 | 0.486933  |
| 4 | 6 | 0 | -2.636020 | 0.624282  | -1.115240 |
| 5 | 6 | 0 | -1.746237 | 1.295854  | -0.367830 |

|    |    |   |           |           |           |
|----|----|---|-----------|-----------|-----------|
| 6  | 6  | 0 | -2.085467 | 2.348027  | 0.387325  |
| 7  | 6  | 0 | -0.935813 | 2.826480  | 0.847851  |
| 8  | 6  | 0 | 0.036167  | 2.031412  | 0.364426  |
| 9  | 7  | 0 | -0.483032 | 1.051606  | -0.289004 |
| 10 | 6  | 0 | 2.040905  | 1.636333  | -0.447294 |
| 11 | 6  | 0 | 3.105584  | 1.945729  | -1.200914 |
| 12 | 6  | 0 | 3.615628  | 0.777788  | -1.573271 |
| 13 | 6  | 0 | 2.862305  | -0.129445 | -0.935177 |
| 14 | 7  | 0 | 1.804804  | 0.380061  | -0.394773 |
| 15 | 6  | 0 | 2.211159  | -2.023752 | -0.158825 |
| 16 | 6  | 0 | 2.335252  | -3.015154 | 0.740917  |
| 17 | 6  | 0 | 1.118949  | -3.211752 | 1.254799  |
| 18 | 6  | 0 | 0.339891  | -2.346972 | 0.591601  |
| 19 | 7  | 0 | 1.001545  | -1.624095 | -0.220631 |
| 20 | 6  | 0 | -1.163709 | -2.452264 | -0.852227 |
| 21 | 6  | 0 | -1.592853 | -2.296108 | -2.121278 |
| 22 | 6  | 0 | -2.373709 | -1.294352 | -2.485089 |
| 23 | 6  | 0 | -2.110132 | -0.565892 | -1.415891 |
| 24 | 7  | 0 | -1.202972 | -1.107324 | -0.697266 |
| 25 | 28 | 0 | 0.337860  | -0.268164 | -1.297255 |
| 26 | 6  | 0 | 1.664182  | 3.660158  | 0.819439  |
| 27 | 6  | 0 | -3.837717 | 1.054857  | -1.565585 |
| 28 | 6  | 0 | -1.843130 | -2.963295 | 1.355280  |
| 29 | 6  | 0 | 4.426349  | -2.008328 | -0.987318 |
| 30 | 6  | 0 | 1.399744  | 3.939470  | 2.112605  |
| 31 | 6  | 0 | 1.724022  | 5.107494  | 2.694813  |
| 32 | 6  | 0 | 2.387500  | 6.012071  | 1.955393  |
| 33 | 6  | 0 | 2.654361  | 5.800234  | 0.655724  |
| 34 | 6  | 0 | 2.307279  | 4.614762  | 0.123331  |
| 35 | 6  | 0 | -4.825494 | 0.183753  | -1.855628 |
| 36 | 6  | 0 | -6.034601 | 0.563062  | -2.306065 |
| 37 | 6  | 0 | -6.272292 | 1.879146  | -2.434321 |

|    |   |   |           |           |           |
|----|---|---|-----------|-----------|-----------|
| 38 | 6 | 0 | -5.315057 | 2.792356  | -2.200752 |
| 39 | 6 | 0 | -4.123858 | 2.358309  | -1.752003 |
| 40 | 6 | 0 | -3.042239 | -3.420814 | 0.945617  |
| 41 | 6 | 0 | -3.941592 | -3.949840 | 1.793761  |
| 42 | 6 | 0 | -3.596868 | -4.064350 | 3.087660  |
| 43 | 6 | 0 | -2.412109 | -3.626465 | 3.547260  |
| 44 | 6 | 0 | -1.573835 | -3.042889 | 2.672243  |
| 45 | 6 | 0 | 5.607318  | -1.361422 | -0.958694 |
| 46 | 6 | 0 | 6.786547  | -1.971275 | -1.174928 |
| 47 | 6 | 0 | 6.775520  | -3.281911 | -1.468947 |
| 48 | 6 | 0 | 5.634891  | -3.991582 | -1.467805 |
| 49 | 6 | 0 | 4.484543  | -3.331372 | -1.244852 |
| 50 | 6 | 0 | -2.089871 | -3.664625 | 5.025684  |
| 51 | 9 | 0 | -3.173727 | -3.649532 | 5.785913  |
| 52 | 9 | 0 | -1.318866 | -2.658735 | 5.408991  |
| 53 | 9 | 0 | -1.435816 | -4.783877 | 5.297539  |
| 54 | 6 | 0 | -5.259153 | -4.489525 | 1.281045  |
| 55 | 9 | 0 | -5.158709 | -4.985597 | 0.057310  |
| 56 | 9 | 0 | -6.142308 | -3.503549 | 1.231598  |
| 57 | 9 | 0 | -5.766077 | -5.435087 | 2.056486  |
| 58 | 6 | 0 | -7.135958 | -0.453103 | -2.522700 |
| 59 | 9 | 0 | -7.024699 | -1.504493 | -1.725136 |
| 60 | 9 | 0 | -7.073680 | -0.899050 | -3.768205 |
| 61 | 9 | 0 | -8.345359 | 0.056125  | -2.347715 |
| 62 | 6 | 0 | -5.596583 | 4.273749  | -2.331456 |
| 63 | 9 | 0 | -6.881650 | 4.566862  | -2.209040 |
| 64 | 9 | 0 | -5.210610 | 4.686790  | -3.529167 |
| 65 | 9 | 0 | -4.935015 | 4.993463  | -1.437793 |
| 66 | 6 | 0 | 1.478808  | 5.335427  | 4.170875  |
| 67 | 9 | 0 | 1.505913  | 4.213321  | 4.873116  |
| 68 | 9 | 0 | 0.277132  | 5.868573  | 4.332260  |
| 69 | 9 | 0 | 2.353533  | 6.168049  | 4.713341  |

|     |   |   |           |           |           |
|-----|---|---|-----------|-----------|-----------|
| 70  | 6 | 0 | 3.420405  | 6.818348  | -0.161503 |
| 71  | 9 | 0 | 4.173916  | 7.613412  | 0.581892  |
| 72  | 9 | 0 | 2.562616  | 7.587009  | -0.815268 |
| 73  | 9 | 0 | 4.205877  | 6.252378  | -1.065058 |
| 74  | 6 | 0 | 8.074963  | -1.176944 | -1.187509 |
| 75  | 9 | 0 | 7.897614  | 0.064330  | -1.614138 |
| 76  | 9 | 0 | 9.012898  | -1.728843 | -1.941185 |
| 77  | 9 | 0 | 8.553407  | -1.102174 | 0.045180  |
| 78  | 6 | 0 | 5.629168  | -5.458149 | -1.843467 |
| 79  | 9 | 0 | 6.661695  | -5.799066 | -2.598586 |
| 80  | 9 | 0 | 4.528231  | -5.815894 | -2.486486 |
| 81  | 9 | 0 | 5.691180  | -6.188011 | -0.739981 |
| 82  | 1 | 0 | -3.069141 | 2.798035  | 0.566646  |
| 83  | 1 | 0 | -0.889743 | 3.771155  | 1.401379  |
| 84  | 1 | 0 | 3.583619  | 2.899041  | -1.435390 |
| 85  | 1 | 0 | 4.534792  | 0.660044  | -2.156876 |
| 86  | 1 | 0 | 3.238839  | -3.553654 | 1.053211  |
| 87  | 1 | 0 | 0.849546  | -3.997264 | 1.970208  |
| 88  | 1 | 0 | -1.501722 | -3.166014 | -2.793385 |
| 89  | 1 | 0 | -2.989924 | -1.139303 | -3.374714 |
| 90  | 1 | 0 | 0.935723  | 3.166714  | 2.749938  |
| 91  | 1 | 0 | 2.705434  | 6.957374  | 2.422230  |
| 92  | 1 | 0 | 2.507613  | 4.483545  | -0.947352 |
| 93  | 1 | 0 | -4.684703 | -0.893833 | -1.675841 |
| 94  | 1 | 0 | -7.269738 | 2.216063  | -2.756953 |
| 95  | 1 | 0 | -3.351864 | 3.127296  | -1.596590 |
| 96  | 1 | 0 | -3.333991 | -3.351870 | -0.114768 |
| 97  | 1 | 0 | -4.311722 | -4.514523 | 3.794152  |
| 98  | 1 | 0 | -0.644563 | -2.607814 | 3.072218  |
| 99  | 1 | 0 | 5.659264  | -0.299555 | -0.679760 |
| 100 | 1 | 0 | 7.725595  | -3.791232 | -1.693564 |
| 101 | 1 | 0 | 3.554392  | -3.917200 | -1.329478 |
